# Supplementary material for: Extreme slow growth as alternative strategy to survive deep starvation in bacteria
Source: PubMed Central journal article supplement (PMC6385201; doi:10.1038/s41467-019-08719-8), 2019-02-21
Supplement: 41467_2019_8719_MOESM1_ESM.pdf [file 41467_2019_8719_MOESM1_ESM.pdf]

1 **Supplementary Information**

2

3

4 Extreme slow growth as alternative strategy to survive deep  
5 starvation in bacteria

6

7

Gray *et al.*

8

9

10

- 11 • Supplementary Table 1 Strains and plasmids used in this study
- 12 • Supplementary Table 2 Primers used to confirm clean deletions
- 13 • Supplementary Figure 1 Deep starvation assay
- 14 • Supplementary Figure 2 Spores and cells in wild type *B. subtilis* cultures
- 15 • Supplementary Figure 3 Survival of a *B. subtilis* germination mutant
- 16 • Supplementary Figure 4 Membrane potential of starved cells
- 17 • Supplementary Figure 5 GFP expression capacity during deep starvation
- 18 • Supplementary Figure 6 Nascent protein and peptidoglycan synthesis
- 19 • Supplementary Figure 7 Effect of 3-MBA on wild type cells and a  
20 resistant mutant
- 21 • Supplementary Figure 8 Protein concentration in starvation buffer
- 22 • Supplementary Figure 9 Survival of different mutants
- 23 • Supplementary References

24

**Supplementary Table 1. Strains and plasmids used in this study**

| <b>Strain</b> | <b>Genotype</b>                                                                                                | <b>Construction, source or reference</b> |
|---------------|----------------------------------------------------------------------------------------------------------------|------------------------------------------|
| BSB1          | <i>trp+</i>                                                                                                    | Lab strain                               |
| 1803          | <i>divIVA::(pdivIVA-gfp divIVA::chl)</i>                                                                       | <sup>1</sup>                             |
| 4626          | <i>trpC2, Ω(spoIIE::erm) amyE::(spc P<sub>xyl</sub>-gfpmut1-yggS)</i>                                          | <sup>2</sup>                             |
| PG344         | <i>spoIIE::erm</i>                                                                                             | P. Gamba, unpublished                    |
| PG344_2       | <i>spoIIE::er(spec)m</i>                                                                                       | This work                                |
| DG001         | <i>spoIIE::erm, divIVA::(pdivIVA-gfp divIVA::chl)</i>                                                          | This work                                |
| JWV026        | <i>spo0A::kan</i>                                                                                              | J.-W. Veening, unpublished               |
| DG004         | <i>spoIIE::erm, divIVA::(pdivIVA-gfp divIVA::chl), spo0A::kan</i>                                              | This work                                |
| BUG1          | <i>clpP::spec</i>                                                                                              | <sup>3</sup>                             |
| DG005         | <i>spoIIE::erm, divIVA::(pdivIVA-gfp divIVA::chl), clpP::spec</i>                                              | This work                                |
| WB800         | <i>nprE aprE epr bpr mpr::ble nprB::bsr vpr wprA::hyg</i>                                                      | <sup>4</sup>                             |
| ΔWB800        | <i>nprE aprE epr bpr mpr::ble nprB::bsr vpr wprA::hyg spoIIE::erm</i>                                          | This work                                |
| Δ6 phage      | <i>trpC2, ΔSPb, sublancin 168-sensitive, Δskin, ΔPBSX, Δprophage1, pks::chl, Δprophage 3::chl</i>              | <sup>5</sup>                             |
| Δphage        | <i>trpC2, ΔSPb, sublancin 168-sensitive, Δskin, ΔPBSX, Δprophage1, pks::chl, Δprophage 3::chl, spoIIE::erm</i> | This work                                |
| 2682          | <i>trpC2 recA::tet</i>                                                                                         | L.J. Wu                                  |
| DG010         | <i>spoIIE::erm, divIVA::(pdivIVA-gfp divIVA::chl), recA::tet</i>                                               | This work                                |
| BRB01         | <i>trpC2, nprB</i>                                                                                             | <sup>6</sup>                             |
| BRB02         | <i>trpC2, nprB, aprE</i>                                                                                       | <sup>6</sup>                             |
| BRB03         | <i>trpC2, nprB, aprE, epr</i>                                                                                  | <sup>6</sup>                             |
| BRB04         | <i>trpC2, nprB, aprE, epr, bpr</i>                                                                             | <sup>6</sup>                             |
| BRB05         | <i>trpC2, nprB, aprE, epr, bpr, nprE,</i>                                                                      | <sup>6</sup>                             |
| BRB06         | <i>trpC2, nprB, aprE, epr, bpr, nprE, mpr</i>                                                                  | <sup>6</sup>                             |
| BRB07         | <i>trpC2, nprB, aprE, epr, bpr, nprE, mpr, vpr</i>                                                             | <sup>6</sup>                             |
| BRB08         | <i>trpC2, nprB, aprE, epr, bpr, nprE, mpr, vpr, wprA</i>                                                       | <sup>6</sup>                             |
| Δ1 protease   | <i>trpC2, nprB, spoIIE::erm</i>                                                                                | This work                                |
| Δ2 protease   | <i>trpC2, nprB, aprE, spoIIE::erm</i>                                                                          | This work                                |
| Δ3 protease   | <i>trpC2, nprB, aprE, epr, spoIIE::erm</i>                                                                     | This work                                |
| Δ4 protease   | <i>trpC2, nprB, aprE, epr, bpr, spoIIE::erm</i>                                                                | This work                                |
| Δ5 protease   | <i>trpC2, nprB, aprE, epr, bpr, nprE, spoIIE::erm</i>                                                          | This work                                |
| Δ6 protease   | <i>trpC2, nprB, aprE, epr, bpr, nprE, mpr, spoIIE::erm</i>                                                     | This work                                |
| Δ7 protease   | <i>trpC2, nprB, aprE, epr, bpr, nprE, mpr, vpr, spoIIE::erm</i>                                                | This work                                |
| Δ8 protease   | <i>trpC2, nprB, aprE, epr, bpr, nprE, mpr, vpr, wprA, spoIIE::erm</i>                                          | This work                                |
| BKE10770      | <i>trpC2, wprA::erm</i>                                                                                        | BGSC                                     |
| DG034         | <i>wprA, spoIIE::erm</i>                                                                                       | This work                                |

|               |                                                             |                               |
|---------------|-------------------------------------------------------------|-------------------------------|
| BKE24160      | <i>trpC2, mmgB::erm</i>                                     | BGSC                          |
| DG097         | <i>spoIIE::er(spec)m, mmgB::erm</i>                         | This work                     |
| BKE12020      | <i>trpC2, manA::erm</i>                                     | BGSC                          |
| DG100         | <i>spoIIE::er(spec)m, manA::erm</i>                         | This work                     |
| BKE08060      | <i>trpC2, acoA::erm</i>                                     | BGSC                          |
| DG091         | <i>spoIIE::er(spec)m, acoA::erm</i>                         | This work                     |
| BKE10740      | <i>trpC2, yisJ::erm</i>                                     | BGSC                          |
| DG095         | <i>spoIIE::er(spec)m, yisJ::erm</i>                         | This work                     |
| BKE07190      | <i>trpC2, yezD::erm</i>                                     | BGSC                          |
| DG092         | <i>spoIIE::er(spec)m, yezD::erm</i>                         | This work                     |
| OC003         | <i>abrB::spec</i>                                           | 7                             |
| DG024         | <i>spoIIE::erm, abrB::spec</i>                              | This work                     |
| GP959         | <i>trpC2, sinI::spec</i>                                    | 8                             |
| DG019         | <i>spoIIE::erm, sinI::spec</i>                              | This work                     |
| codY          | <i>codY::spec</i>                                           | S. Syvertsson                 |
| DG051         | <i>spoIIE::erm, divIV-gfp::chl, codY::spec</i>              | This work                     |
| 8G32          | <i>comK::kan</i>                                            | 9                             |
| DG021         | <i>spoIIE::erm, divIV-gfp::chl, comK::kan</i>               | This work                     |
| $\Delta$ sigD | <i>sigD::kan</i>                                            | S. Syvertsson,<br>unpublished |
| DG049         | <i>spoIIE::erm, divIV-gfp::chl, sigD::kan</i>               | This work                     |
| QB5344        | <i>sigB::chl</i>                                            | J. Stülke                     |
| DG057         | <i>spoIIE::erm, sigB::chl</i>                               | This work                     |
| BG546         | <i>BG1, pnpA::kan</i>                                       | 10                            |
| DG048         | <i>spoIIE::erm, divIV-gfp::chl, pnpA::kan</i>               | This work                     |
| BKE25750      | <i>trpC2, nucB::erm</i>                                     | BGSC                          |
| DG067         | <i>spoIIE::er(spec)m, nucB::erm</i>                         | This work                     |
| BD2941        | <i>nucA::spec</i>                                           | 11                            |
| DG047         | <i>spoIIE::erm, nucA::spec</i>                              | This work                     |
| 1A792         | <i>trpC2, lytABC::neo, lytD::tet, lytE::chl, lytF::spec</i> | 12                            |
| DG022         | <i>lytABC::neo, spoIIE::erm</i>                             | This work                     |
| BKE27600      | <i>relA::erm</i>                                            | BGSC                          |
| DG077         | <i>spoIIE::er(spec)m, relA::erm</i>                         | This work                     |
| 1A905         | <i>sigW::erm</i>                                            | BGSC                          |
| DG129         | <i>spoIIE::er(spec)m, sigW::erm</i>                         | This work                     |
| HB10216       | <i>sigM::kan</i>                                            | 13                            |
| DG132         | <i>spoIIE::erm, sigM::kan</i>                               | This work                     |
| GP146         | <i>sigL::spec</i>                                           | 14                            |
| DG131         | <i>spoIIE::erm, sigL::spec</i>                              | This work                     |
| HB7007        | <i>sigX::spec</i>                                           | 15                            |
| DG123         | <i>spoIIE::erm, sigX::spec</i>                              | This work                     |
| $\Delta$ sigG | <i>trpC2, (spoIIIG::ermC)731</i>                            | J. Errington lab stocks       |
| DG128         | <i>spoIIE::er(spec)m, (spoIIIG::ermC)731</i>                | This work                     |
| 4265          | <i>sigI, rsgI::neo</i>                                      | 16                            |
| DG133         | <i>sigI, rsgI::neo, spoIIE::erm</i>                         | This work                     |
| BKE27120      | <i>sigV::erm</i>                                            | BGSC                          |
| DG126         | <i>spoIIE::er(spec)m, sigV::erm</i>                         | This work                     |
| $\Delta$ sigK | <i>sigK::erm</i>                                            | BGSC                          |
| DG124         | <i>spoIIE::er(spec)m, sigK::erm</i>                         | This work                     |
| $\Delta$ sigF | <i>trpC2, (spoIIAC::chl)678</i>                             | J. Errington lab stocks       |
| DG130         | <i>spoIIE::erm, (spoIIAC::chl)678</i>                       | This work                     |
| BKE27120      | <i>trpC2, sigE::erm</i>                                     | BGSC                          |
| DG125         | <i>spoIIE::er(spec)m, sigE::erm</i>                         | This work                     |
| BKE35500      | <i>trpC2, degS::ery</i>                                     | BGSC                          |

|                |                                                                               |                                       |
|----------------|-------------------------------------------------------------------------------|---------------------------------------|
| DG122          | <i>spoIIE::er(spec)m, degS::ery</i>                                           | This work                             |
| BD1818         | <i>degU::chl</i>                                                              | PHRI*                                 |
| DG016          | <i>spoIIE::erm, degU::chl</i>                                                 | This work                             |
| BKE01700       | <i>trpC2, murQ::erm</i>                                                       | BGSC                                  |
| DG121          | <i>spoIIE::er(spec)m, murQ::erm</i>                                           | This work                             |
| DG016          | <i>spoIIE::erm, degU::chl</i>                                                 | This work                             |
| TE47           | <i>amyE::(Phyperspank-sfGFP*-ilvD(terminator) lacI(cis) spc)</i>              | T. Ewen, unpublished                  |
| DG017          | <i>amyE::(Phyperspank-sfGFP*-ilvD(terminator) lacI(cis) spc), spoIIE::erm</i> | This work                             |
| BKE00980       | <i>sigH::erm</i>                                                              | BGSC                                  |
| BWW1           | <i>spoIIE::er(spec)m, sigH::erm</i>                                           | This work                             |
| FB113          | <i>cwlJ::tet sleB::spc</i>                                                    | 17                                    |
| DWA27          | <i>ftsZ-G196S-N263K (cat)</i>                                                 | 18                                    |
| HS545          | <i>ftsZ-G196S-N263K (cat), spoIIE::erm</i>                                    | This work                             |
| KS15           | <i>dacA::spc</i>                                                              | K. Rafiq & R. Daniel, thesis K. Rafiq |
| <b>Plasmid</b> | <b>Genotype</b>                                                               | <b>Source or reference</b>            |
| pDR244         | <i>cre, spec, amp</i>                                                         | BGSC                                  |
| pErm::Spec     | <i>erm::spec</i>                                                              | 19                                    |

\*Public Health Research Institute Centre

26

27

28

## Supplementary Table 2. Primers used to confirm clean deletions

| Primer | Sequence                         | Gene                |
|--------|----------------------------------|---------------------|
| DG1    | 5'-GATCCTCCGGTGCTTGTG-3'         | Forward <i>aprE</i> |
| DG2    | 5'-GGCCGCATCTGATGTCTTTG-3'       | Reverse <i>aprE</i> |
| DG3    | 5'-GATACGCTTGACATCCCGAC-3'       | Forward <i>bpr</i>  |
| DG4    | 5'-GAACGCTCCGCCTACCAG-3'         | Reverse <i>bpr</i>  |
| DG5    | 5'-GCGCGATCCTTCACATAGCC-3'       | Forward <i>nprE</i> |
| DG6    | 5'-GCCTCATTGCGTTAGACAGCG-3'      | Reverse <i>nprE</i> |
| DG7    | 5'-CACCCGAGTGAATGTGC-3'          | Forward <i>epr</i>  |
| DG8    | 5'-CCTGCGAGCAGCAGTAATTC-3'       | Reverse <i>epr</i>  |
| DG9    | 5'-GCGGATTACTGTTGAAGG-3'         | Forward <i>mpr</i>  |
| DG10   | 5'-CTCTGTACTCGGCTCCTCATC-3'      | Reverse <i>mpr</i>  |
| DG11   | 5'-GCTTATACTGGCATATGGAGC-3'      | Forward <i>nprB</i> |
| DG12   | 5'-CATCGAGCTTATGAAAGAGCG-3'      | Reverse <i>nprB</i> |
| DG13   | 5'-CTTAATCACAAGAGATATCCAC-3'     | Forward <i>vpr</i>  |
| DG14   | 5'-CTTATGAACAGAGACGAATTGC-3'     | Reverse <i>vpr</i>  |
| DG15   | 5'-GGAGGCCTGTGGGTCGGCTTC-3'      | Forward <i>wprA</i> |
| DG16   | 5'-CGGCTTATCGGTATTCGATTGC-3'     | Reverse <i>wprA</i> |
| DG17   | 5'-TCGCGACATAGCGGTTGTTTCTGAGC-3' | Forward <i>sigI</i> |
| DG18   | 5'-GAGCATAATAGCAGTCATCG-3'       | Reverse <i>sigI</i> |

29

30

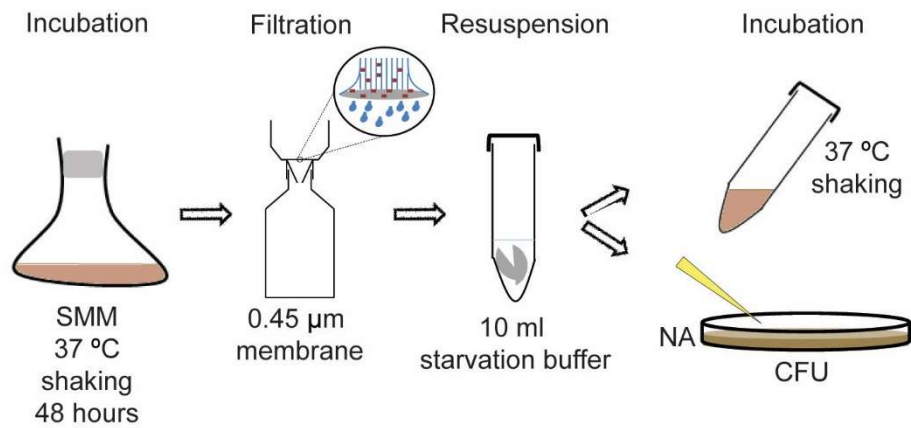

31

32

33 **Supplementary Figure 1. Deep starvation assay**

34 Cartoon of the deep starvation assay. Strains were cultured in 10 ml SMM at 37°C  
 35 with shaking for 48 hours followed by filtration using 47 mm filter membranes  
 36 with 0.45 μm pores size (ThermoFisher). Cells were subsequently resuspended in  
 37 10 ml starvation buffer (15 mM (NH<sub>4</sub>)<sub>2</sub>SO<sub>4</sub>, 80 mM K<sub>2</sub>HPO<sub>4</sub>, 44 mM KH<sub>2</sub>PO<sub>4</sub>, 50  
 38 mM NaCl, 0.8 mM MgSO<sub>4</sub>), and incubated at 37°C under continuous shaking for  
 39 14 days. Periodic sampling was performed to determine the CFU through serial  
 40 dilutions and plating on nutrient agar.

41

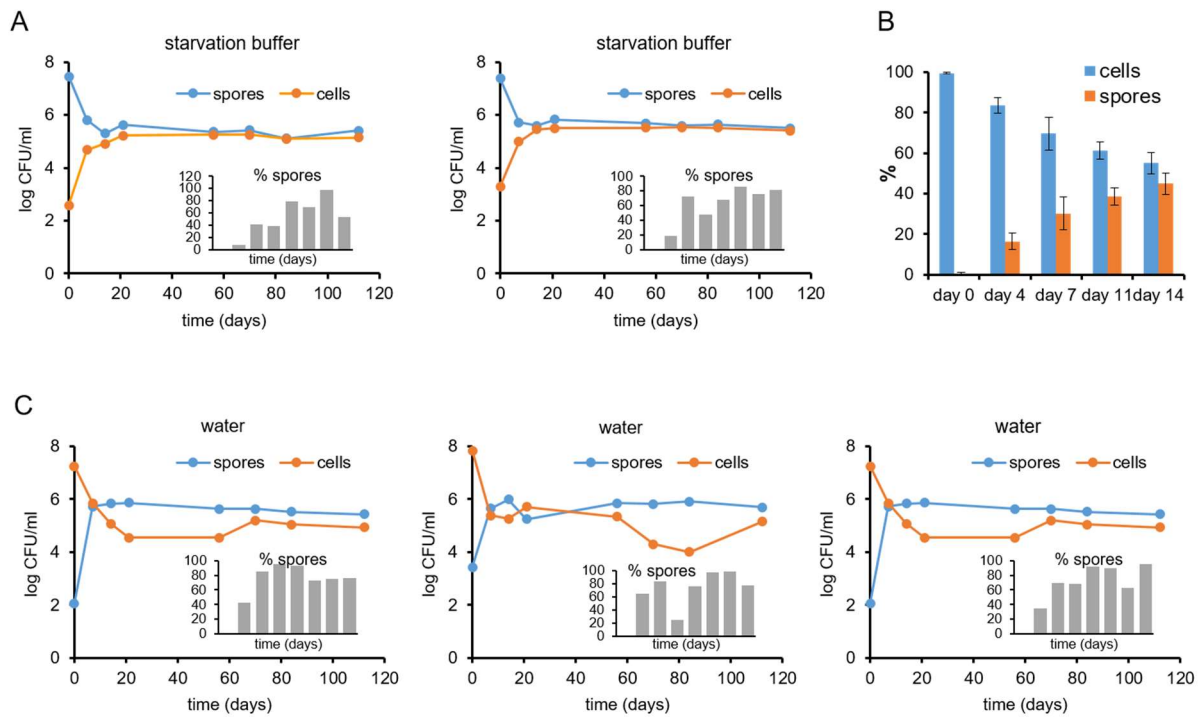

42

43

44 **Supplementary Figure 2. Spores and cells in wild type *B. subtilis* cultures**

45 (A) CFU of spores and cells in a wild type *B. subtilis* culture (strain BSB1) incubated  
 46 in starvation buffer. The percentage of spores is indicated by the bar diagram.

47 These are the biological replicates of Fig. 1C in the main text. (B) Fraction of  
 48 spores and non-sporulating cells measured using phase-contrast microscopy.

49 Results from three biological replicates are shown. (C) Three biological replicates

50 of CFU of spores and cells in a wild type *B. subtilis* culture (strain BSB1) incubated  
 51 in water. The percentage of spores is indicated by the bar diagram.

52

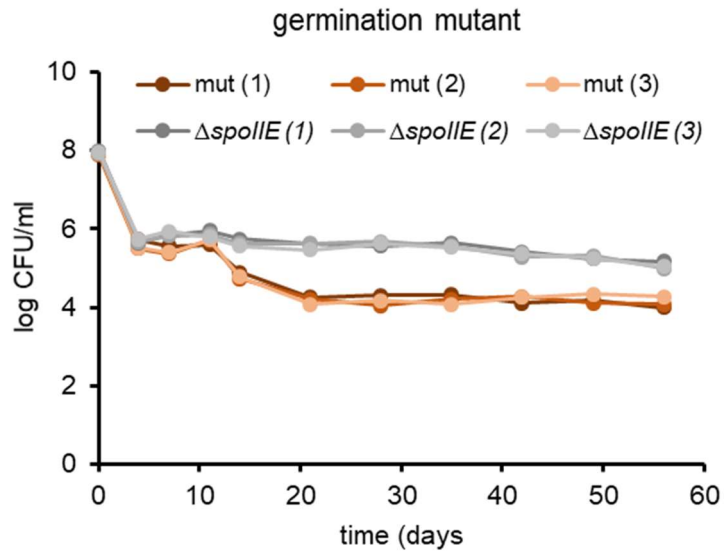

53

54 **Supplementary Figure 3. Survival of a *B. subtilis* germination mutant**

55 CFU of *B. subtilis* germination mutant (mut) FB113 ( $\Delta cwIJ \Delta sleB$ )<sup>17</sup> and the  
 56  $\Delta spoIIE$  control. Both strains were incubated in starvation buffer. Three biological  
 57 replicates are shown.

58

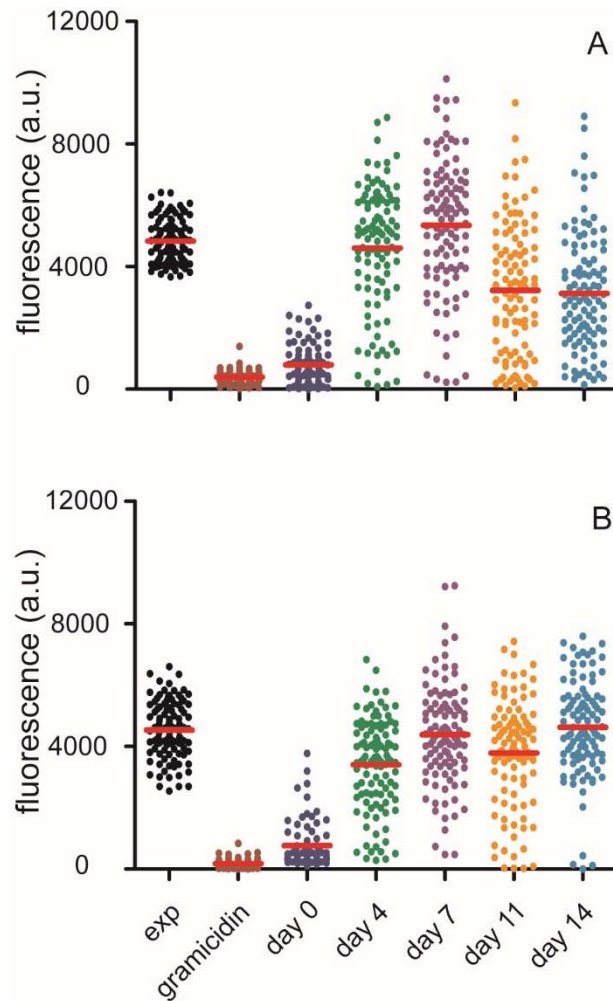

59

60

61 **Supplementary Figure 4. Membrane potential levels of starved cells**

62 (A & B) Two biological replicates of Fig. 3E in the main text. After 7, 11 and 14  
 63 days deep starvation the relative membrane potential was measured in individual  
 64 cells by following the uptake of the membrane potential sensitive fluorescence dye  
 65 DiSC<sub>3</sub>(5). As controls, exponentially growing cells (OD<sub>600</sub> 0.2), and cells treated  
 66 with 10 µg/ml gramicidin ABC were determined. Fluorescence intensities of  
 67 approximately 100 cells were quantified.

68



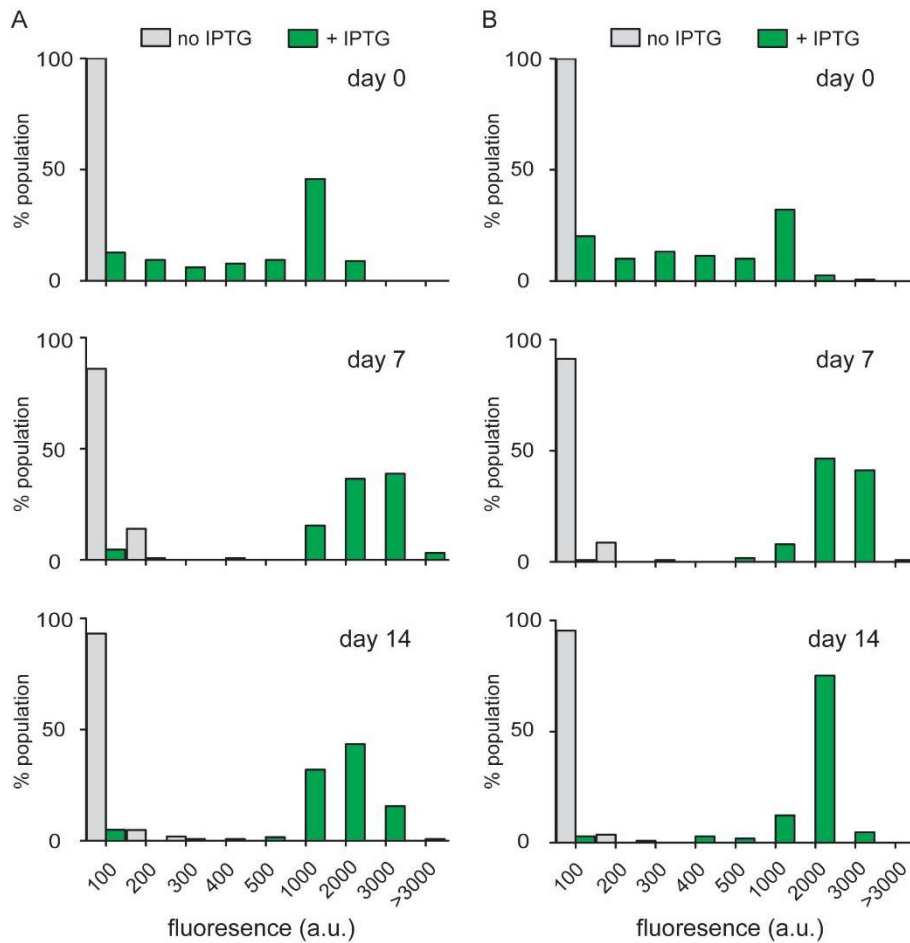

69

70

71 **Supplementary Figure 5. GFP expression capacity during deep starvation**

72 (A & B) Two biological replicates of Fig. 4 in the main text. *B. subtilis* strain  $\Delta spoIIE$   
 73 containing an inducible GFP reporter (*amyE::Phyerspank-sfGFP*) was incubated  
 74 in starvation buffer for 0, 7 and 14 days, followed by incubation in the presence  
 75 and absence of 1 mM IPTG for 4 hours. The fluorescence of approximately 100  
 76 cells was quantified.

77

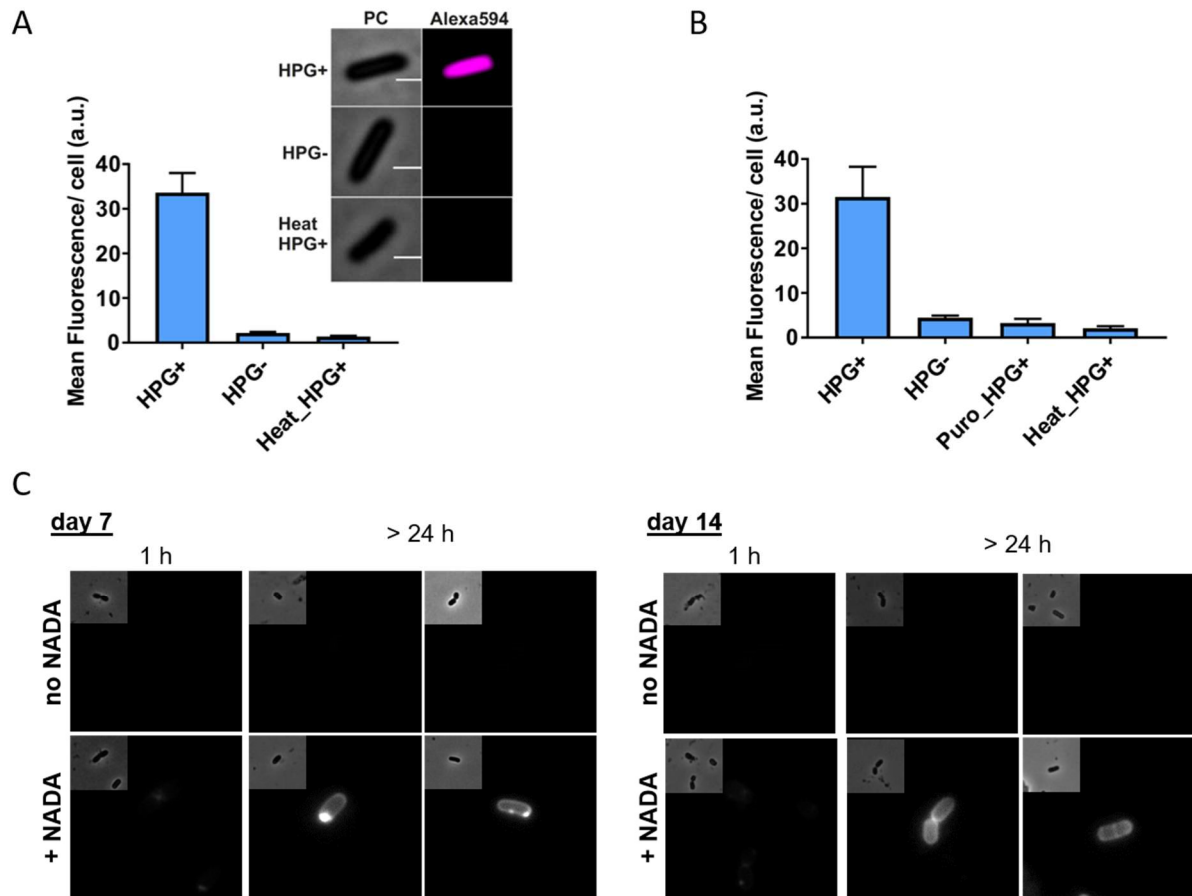

78

79 **Supplementary Figure 6. Nascent protein and peptidoglycan synthesis**

80 *B. subtilis*  $\Delta spoIIE$  cells (strain DG001) were cultured for 14 days (A) or 19 days  
 81 (B) in starvation buffer and incubated with the amino acid analog L-  
 82 homopropargylglycine (HPG). Incorporated HPG was fluorescently labelled with  
 83 Alexa594-azide using click chemistry<sup>20</sup>. Inset in (A) shows a representative  
 84 microscopic image (bar 1  $\mu$ m). As controls cells were heat-killed (Heat\_HPG+)  
 85 before incubation with HPG or incubated with the translation inhibitor puromycin  
 86 (Puro\_HPG+). Bar diagrams show mean Alexa594 fluorescence ( $\pm$  SEM) in cells  
 87 (60 and 45 cells for (A) and (B), respectively). (C) Peptidoglycan labelling with 5  
 88  $\mu$ M NADA<sup>21</sup>. Cells were incubated with NADA for 48 hrs and resuspended in  
 89 Starvation buffer. Samples were taken after 1 h and > 24 h (two examples  
 90 shown).

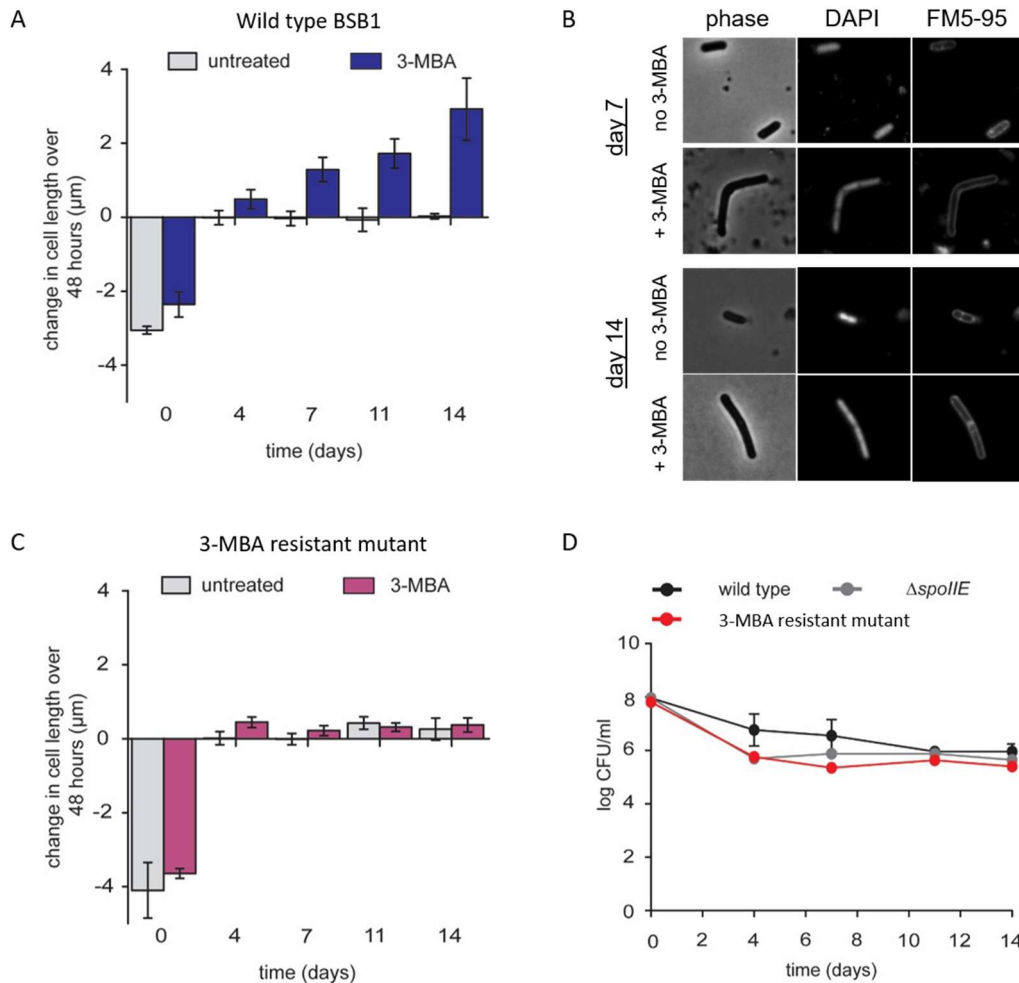

91 **Supplementary Figure 7. Effect of 3-MBA on wild type cells and on a**  
 92 **resistant mutant**

93 (A) *B. subtilis* wild type strain BSB1, was incubated for 14 days in starvation  
 94 buffer. At regular time intervals samples were withdrawn and incubated with 3-  
 95 MBA for 48 hours, and the average change in cell length was calculated for  
 96 approximately 100 individual cells for each time point. Bar diagrams depict the  
 97 average and standard deviation of 3 independent experiments. (B) Representative  
 98 picture of DNA (DAPI) and membrane (FM5-95) stained 7 and 17 days starved  
 99  $\Delta spoIIE$  cells (strain DG001) treated without or with 3-MBA (48 h). (C) *B. subtilis*  
 100 mutant DWA27, which contains two FtsZ mutations (G196S, N263K) rendering the  
 101 strain resistant to the cell division inhibitor 3-methoxybenzamide (3-MBA)<sup>18</sup>,  
 102 treated with 3-BMA as described in (A). (D) Average CFUs of the related cultures.

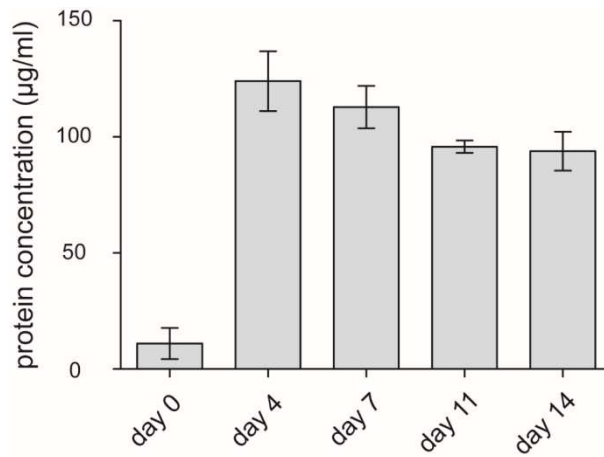

103

104

105 **Supplementary Figure 8. Protein concentration in starvation buffer**

106 Concentration of proteins released in the medium by lysed cells during deep  
107 starvation of *B. subtilis* ΔspoIIE cells as measured using a Bradford assay. Bar  
108 diagram represents average and standard deviation of 3 independent  
109 experiments.

110

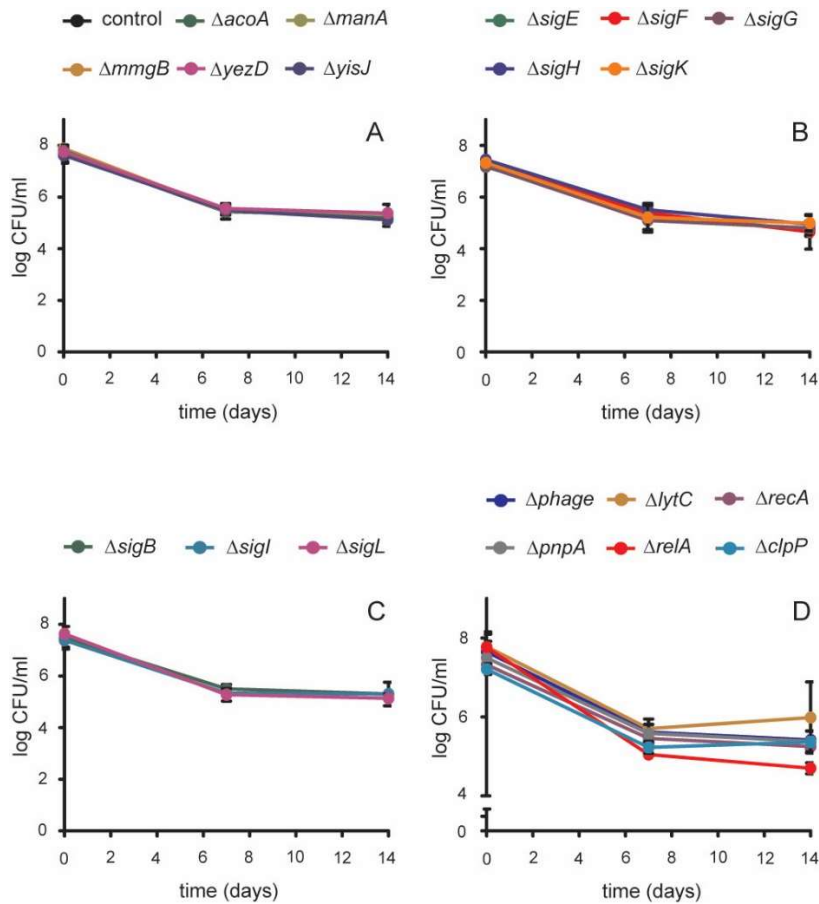

111

112

113 **Supplementary Figure 9. Survival of different mutants**

114 (A) Survival of mutants that were selected from the up-regulated genes under

115 deep starvation conditions. (B) Survival of cells lacking sporulation sigma factors

116 ( $\Delta\text{sigE}$ ,  $-F$ ,  $-G$ ,  $-H$ ,  $-K$ ). (C) Survival of cells lacking either the general stress

117 response sigma factor SigB, the cold shock sigma factor SigL or the heat shock

118 sigma factors SigI. (D) Survival of cells lacking either the major autolysin LytC,

119 the protein quality control protease ClpP, the stringent response regulator RelA,

120 the DNA recombination/repair proteins RecA or PnpA (only log 4-8 CFU/ml is

121 shown to emphasize differences). Graphs represent averages and standard

122 deviations of 3 independent experiments. The  $\Delta\text{spoIIE}$  background strain was used

123 in all experiments.

124

## 125 **Supplementary References**

126

- 127 1 Thomaides, H. B., Freeman, M., El Karoui, M. & Errington, J. Division site selection protein DivIVA  
128 of *Bacillus subtilis* has a second distinct function in chromosome segregation during sporulation.  
129 *Genes Dev.* **15**, 1662-1673 (2001).
- 130 2 Schirner, K., Marles-Wright, J., Lewis, R. J. & Errington, J. Distinct and essential morphogenic  
131 functions for wall- and lipo-teichoic acids in *Bacillus subtilis*. *EMBO J.* **28**, 830-842 (2009).
- 132 3 Gerth, U. *et al.* Fine-tuning in regulation of Clp protein content in *Bacillus subtilis*. *J. Bacteriol.*  
133 **186**, 179-191 (2004).
- 134 4 Wu, S. C. *et al.* Functional production and characterization of a fibrin-specific single-chain  
135 antibody fragment from *Bacillus subtilis*: effects of molecular chaperones and a wall-bound  
136 protease on antibody fragment production. *Appl. Environ. Microbiol.* **68**, 3261-3269 (2002).
- 137 5 Westers, H. *et al.* Genome engineering reveals large dispensable regions in *Bacillus subtilis*. *Mol*  
138 *Biol Evol* **20**, 2076-2090 (2003).
- 139 6 Pohl, S. *et al.* Proteomic analysis of *Bacillus subtilis* strains engineered for improved production  
140 of heterologous proteins. *Proteomics* **13**, 3298-3308 (2013).
- 141 7 Chumsakul, O. *et al.* Genome-wide binding profiles of the *Bacillus subtilis* transition state  
142 regulator AbrB and its homolog Abh reveals their interactive role in transcriptional regulation.  
143 *Nucleic Acids Res.* **39**, 414-428 (2011).
- 144 8 Diethmaier, C. *et al.* A novel factor controlling bistability in *Bacillus subtilis*: the YmdB protein  
145 affects flagellin expression and biofilm formation. *J. Bacteriol.* **193**, 5997-6007 (2011).
- 146 9 Smits, W. K. *et al.* Temporal separation of distinct differentiation pathways by a dual specificity  
147 Rap-Phr system in *Bacillus subtilis*. *Mol Microbiol* **65**, 103-120 (2007).
- 148 10 Liu, B. *et al.* Global analysis of mRNA decay intermediates in *Bacillus subtilis* wild-type and  
149 polynucleotide phosphorylase-deletion strains. *Mol. Microbiol.* **94**, 41-55 (2014).
- 150 11 Provvedi, R., Chen, I. & Dubnau, D. NucA is required for DNA cleavage during transformation of  
151 *Bacillus subtilis*. *Mol. Microbiol.* **40**, 634-644 (2001).
- 152 12 Margot, P., Pagni, M. & Karamata, D. *Bacillus subtilis* 168 gene *lytF* encodes a gamma-D-  
153 glutamate-meso-diaminopimelate murepeptidase expressed by the alternative vegetative sigma  
154 factor, sigmaD. *Microbiology* **145 ( Pt 1)**, 57-65 (1999).
- 155 13 Luo, Y. & Helmann, J. D. Analysis of the role of *Bacillus subtilis* sigma(M) in beta-lactam resistance  
156 reveals an essential role for c-di-AMP in peptidoglycan homeostasis. *Mol. Microbiol.* **83**, 623-639  
157 (2012).
- 158 14 Commichau, F. M. *et al.* Characterization of *Bacillus subtilis* mutants with carbon source-  
159 independent glutamate biosynthesis. *Journal of molecular microbiology and biotechnology* **12**,  
160 106-113 (2007).
- 161 15 Huang, X. J., Decatur, A., Sorokin, A. & Helmann, J. D. The *Bacillus subtilis* sigma(X) protein is an  
162 extracytoplasmic function sigma factor contributing to survival at high temperature. *J. Bacteriol.*  
163 **179**, 2915-2921 (1997).
- 164 16 Schirner, K. & Errington, J. The cell wall regulator {sigma}I specifically suppresses the lethal  
165 phenotype of *mbl* mutants in *Bacillus subtilis*. *J. Bacteriol.* **191**, 1404-1413 (2009).
- 166 17 Paidhungat, M. & Setlow, P. Role of ger proteins in nutrient and nonnutrient triggering of spore  
167 germination in *Bacillus subtilis*. *J. Bacteriol.* **182**, 2513-2519. (2000).
- 168 18 Adams, D. W., Wu, L. J. & Errington, J. A benzamide-dependent *ftsZ* mutant reveals residues  
169 crucial for Z-ring assembly. *Mol Microbiol* **99**, 1028-1042 (2016).
- 170 19 Steinmetz, M. & Richter, R. Plasmids designed to alter the antibiotic resistance expressed by  
171 insertion mutations in *Bacillus subtilis*, through *in vivo* recombination. *Gene* **142**, 79-83 (1994).
- 172 20 Stempler, O. *et al.* Interspecies nutrient extraction and toxin delivery between bacteria. *Nat*  
173 *Commun* **8**, 315 (2017).
- 174 21 Kuru, E. *et al.* In Situ probing of newly synthesized peptidoglycan in live bacteria with fluorescent  
175 D-amino acids. *Angewandte Chemie* **51**, 12519-12523 (2012).
